# Supplementary material for: Accessing invasion-competent Plasmodium vivax merozoites reveals antibody-dependent NK cell activation
Source: Research Square preprint supplement (doi:10.21203/rs.3.rs-9011486/v1), 2026-04-01
Supplement: Supplementary file 1 [file 4c18a8a1a6def5d19e18b01a.docx]

**Supplementary Fig. S1 | Optimization of merozoite isolation by sequential filtration cycles**


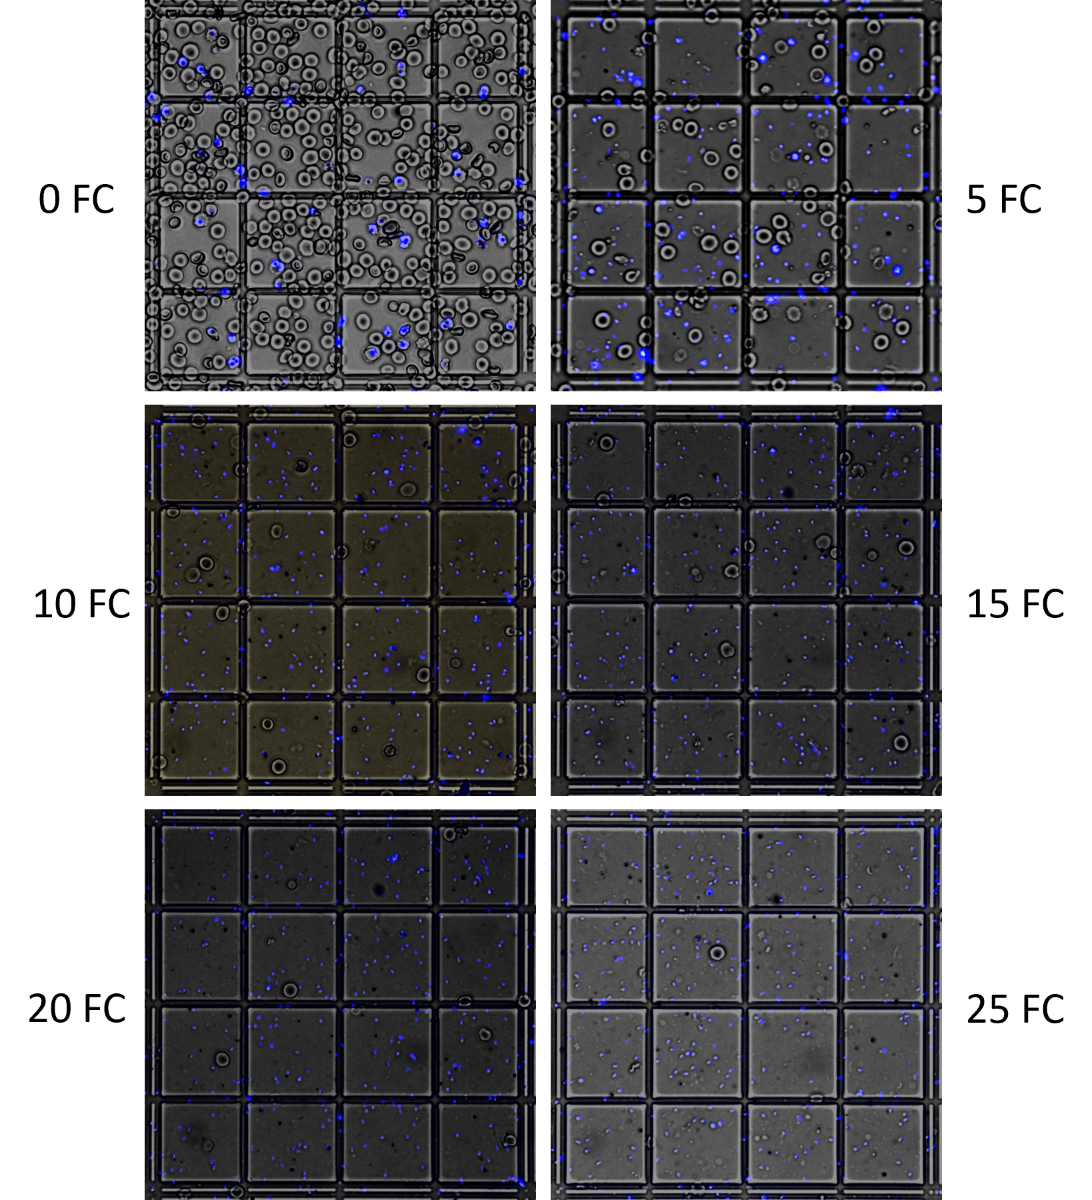


Representative fields from C-chip counting chambers of ML10-synchronized *P. falciparum* schizont-stage cultures after 0, 5, 10, 15, 20, and 25 filtration cycles (FC). Images were acquired at 40× magnification and represent merged brightfield and fluorescence channels. Parasite nuclei are shown in blue following Hoechst staining.

**Supplementary Fig. S2 |** **Microscopic evaluation of liposome-extruder filtration using 2 µm and 5 µm polycarbonate membranes**


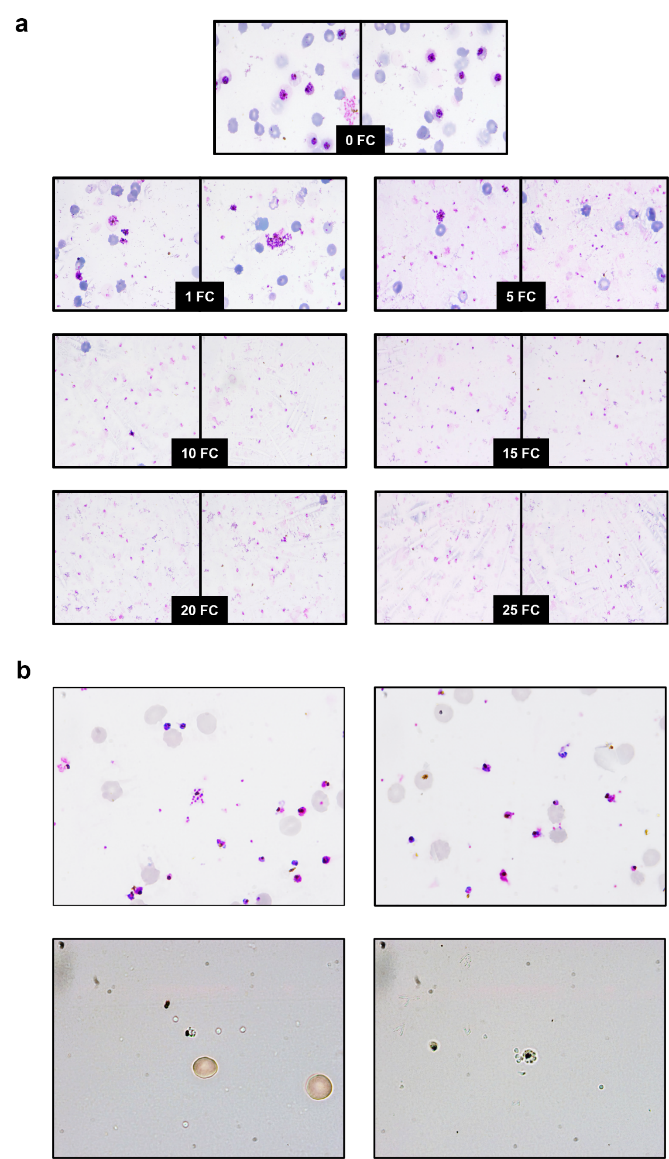


**a**, Representative brightfield microscopy images (100× magnification) of Giemsa-stained smears from ML10-synchronized *P. falciparum* schizont-stage cultures processed using the liposome extruder fitted with a 2 µm polycarbonate membrane after 0, 5, 10, 15, 20, and 25 filtration cycles (FC).

**b**, Samples obtained after five filtration cycles (5 FC) using the liposome extruder equipped with a 5 µm polycarbonate membrane. Upper panels show Giemsa-stained smears, and lower panels show freshly prepared samples observed under brightfield microscopy (100× magnification).

**Supplementary Fig. S3 | Invasion assay of *Plasmodium falciparum* merozoites obtained
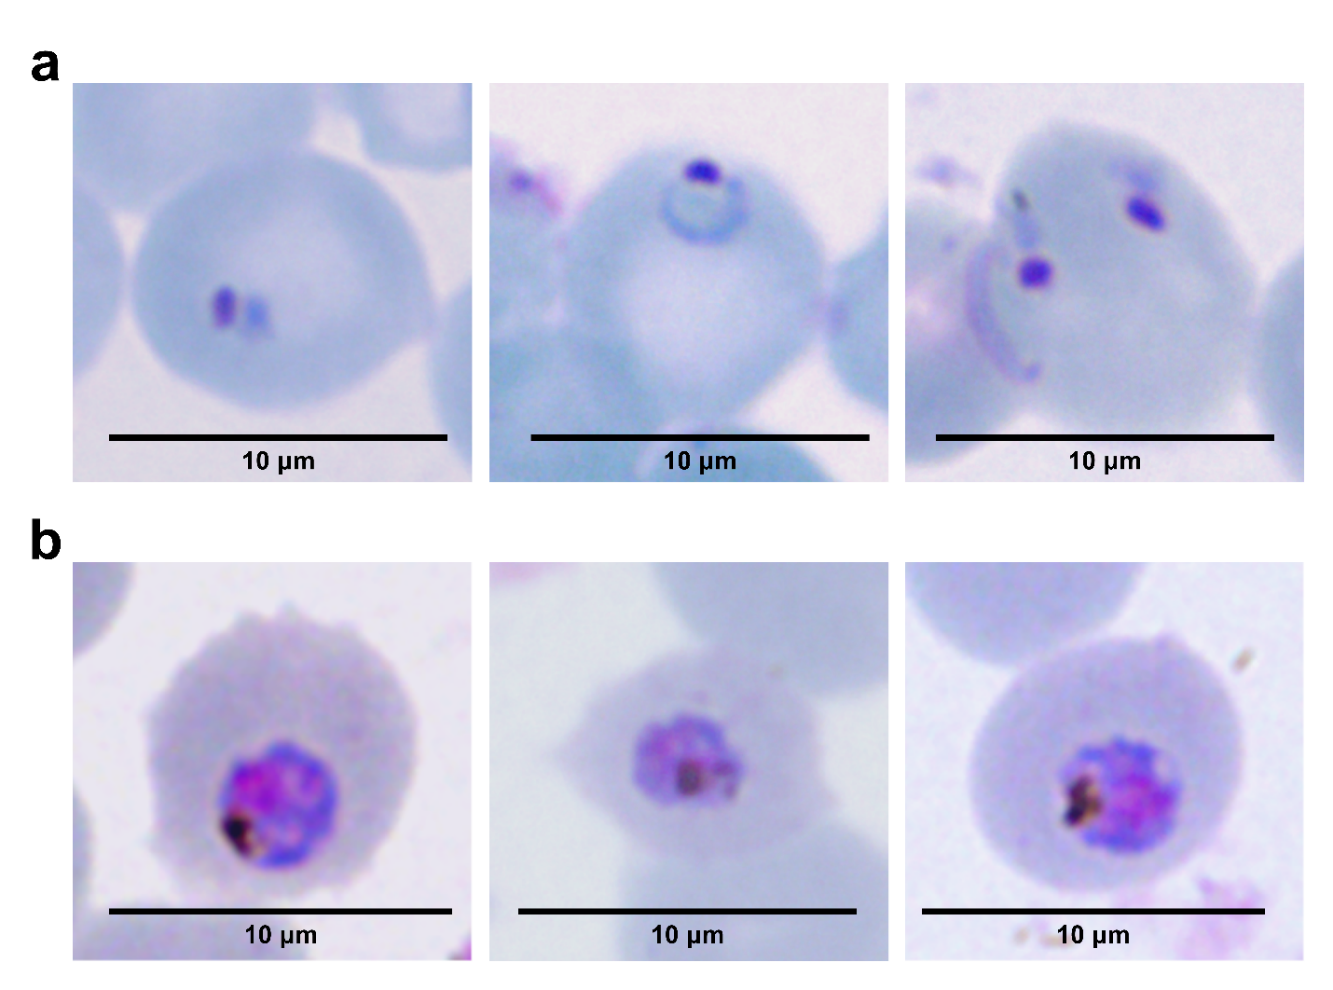
after ML10 treatment and mechanical filtration.**

**Supplementary Figure 3 | Invasion assay of *Plasmodium falciparum* merozoites obtained after ML10 treatment and mechanical filtration.**

**a**, Representative Giemsa-stained thin blood smears showing newly infected red blood cells (ring-stage parasites) 3 h after incubation of mechanically isolated *P. falciparum* merozoites with fresh uninfected RBCs.

**b**, Representative Giemsa-stained thin blood smears showing intracellular parasite development 24 h after invasion, with parasites progressing beyond the ring stage, indicating productive invasion and preserved developmental competence of the isolated merozoites.

Scale bars, 10 µm.
